# Supplementary material for: Enhanced thermally stable performance of Pr3+-doped vanadate phosphor by inhibiting the intervalence charge transfer quenching channel
Source: Royal Society of Chemistry journal article supplement (doi:10.1039/d3dt03930g), 2024-01-01
Supplement: d3dt03930g1.pdf [file d3dt03930g1.pdf]

# Supporting Information

Enhanced Thermal Stable Performance in Pr<sup>3+</sup>-doped Vanadate Phosphor by  
Inhibiting Intervalence Charge Transfer Quenching Channel

Jianxia Liu,<sup>a</sup> Chunwei Yang,<sup>a</sup> Hong Chai,<sup>a,b</sup> Yanmei Xin,<sup>a</sup> Song Qu,<sup>a</sup> and Ning Guo,<sup>a,\*</sup>

<sup>a</sup> Department of Chemistry, University of Shanghai for Science and Technology, Shanghai  
200093, P. R. China.

<sup>b</sup> School of Energy and Power Engineering, University of Shanghai for Science and  
Technology, Shanghai 200093, P. R. China.

\*Corresponding author: E-mail: [guoning@usst.edu.cn](mailto:guoning@usst.edu.cn)

Figure S1

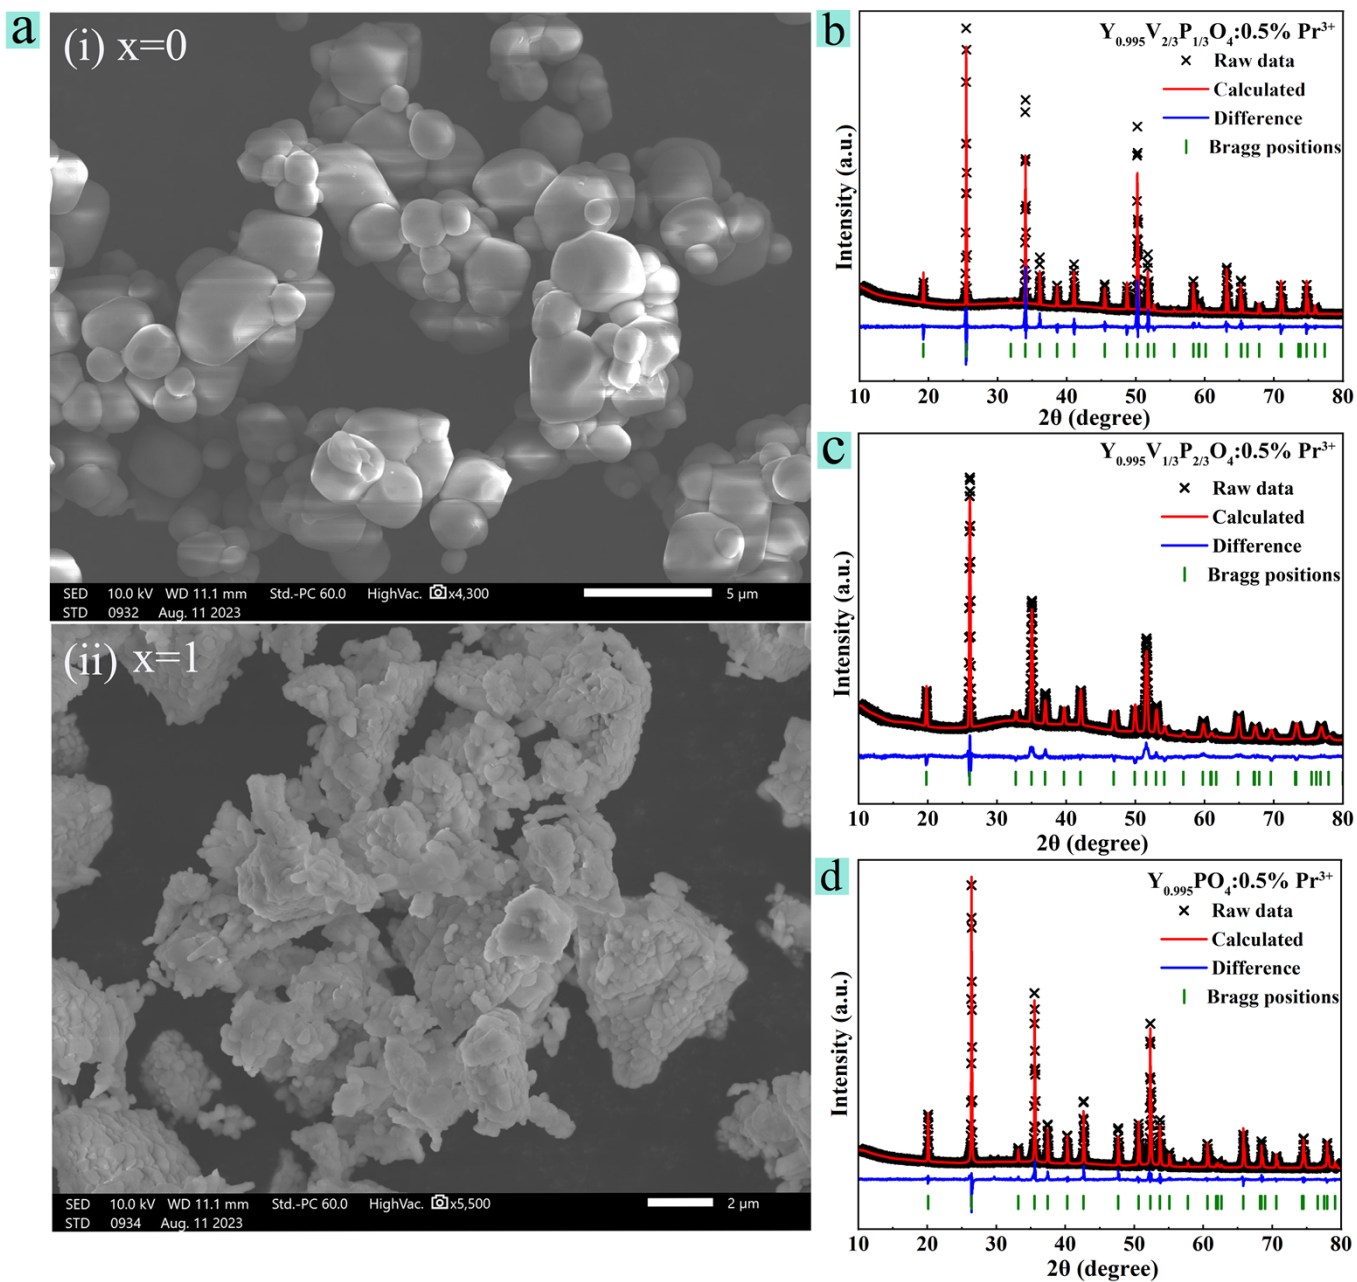

Figure S1. (a) (i) SEM of  $Y_{0.995}VO_4:0.5\% Pr^{3+}$ . (ii) SEM of  $Y_{0.995}PO_4:0.5\% Pr^{3+}$ . XRD Rietveld refinement patterns of (b) the  $Y_{0.995}V_{2/3}P_{1/3}O_4:0.5\% Pr^{3+}$ , (c) the  $Y_{0.995}V_{1/3}P_{2/3}O_4:0.5\% Pr^{3+}$  and (d) the  $Y_{0.995}PO_4:0.5\% Pr^{3+}$ .

Figure S2

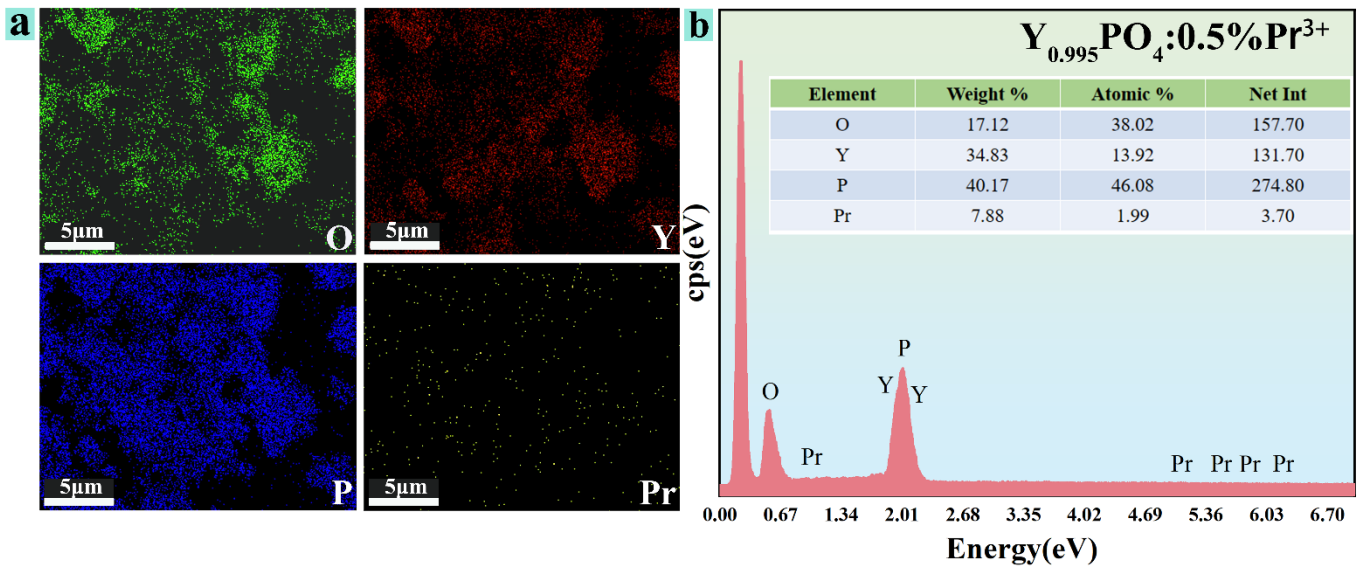

Figure S2. (a) The elemental mapping analysis images of O, Y, P, and Pr. (b) The EDS spectrum of  $Y_{0.995}PO_4:0.5\% Pr^{3+}$ .

Figure S3

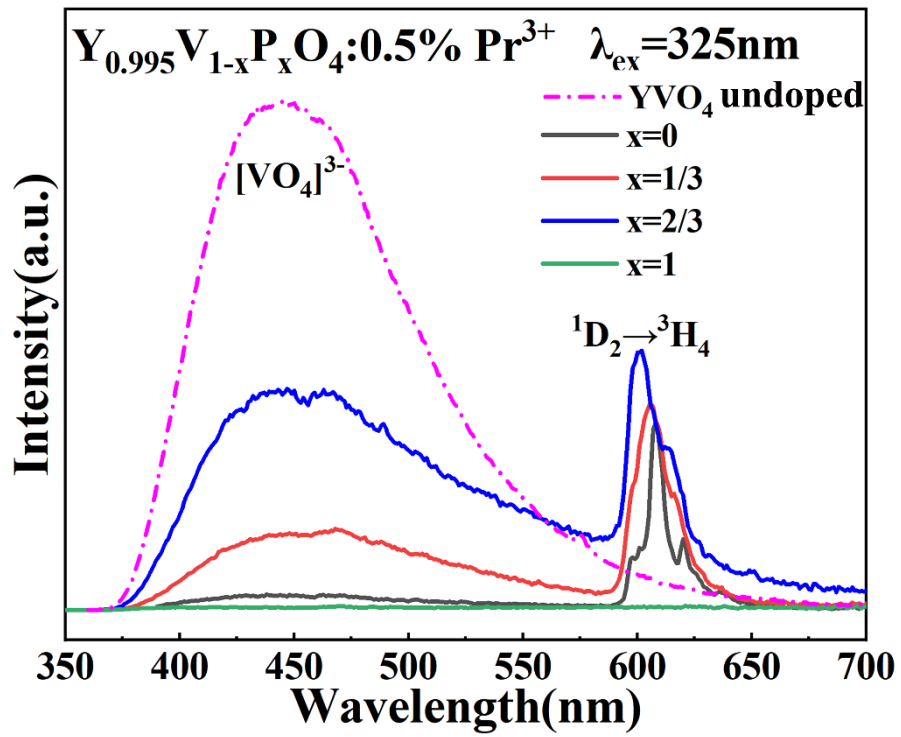

Figure S3. PL spectra of YVO<sub>4</sub> and Y<sub>0.995</sub>V<sub>1-x</sub>P<sub>x</sub>O<sub>4</sub>:0.5%Pr<sup>3+</sup> (x = 0, 1/3, 2/3, 1) ( $\lambda_{\text{ex}} = 325$  nm).

Figure S4

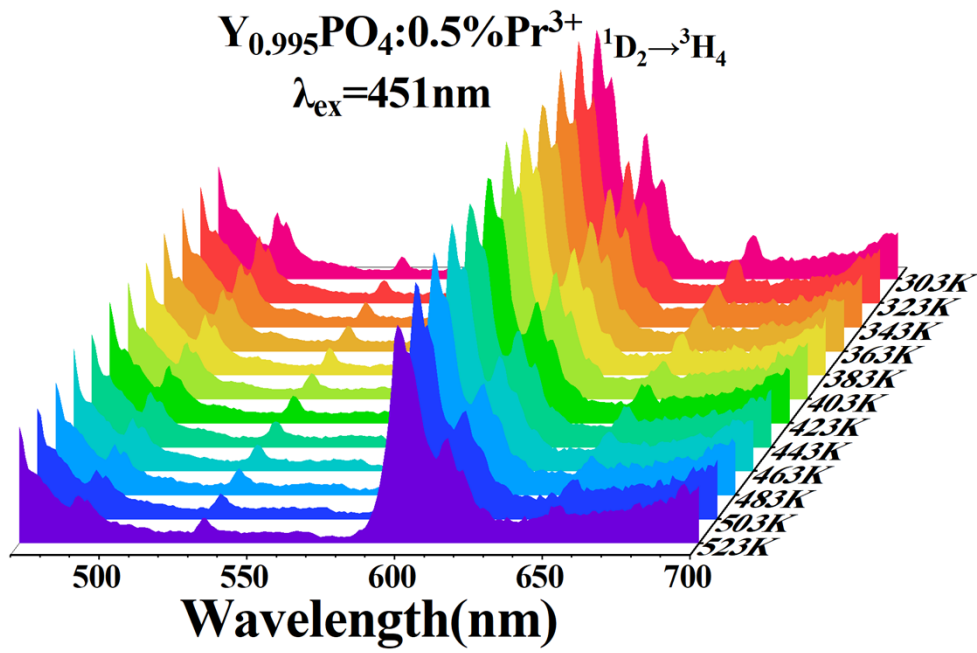

Figure S4. Temperature-dependent PL spectra of  $\text{Y}_{0.995}\text{PO}_4:0.5\% \text{Pr}^{3+}$  under excitation at 451 nm.

**Figure S5**

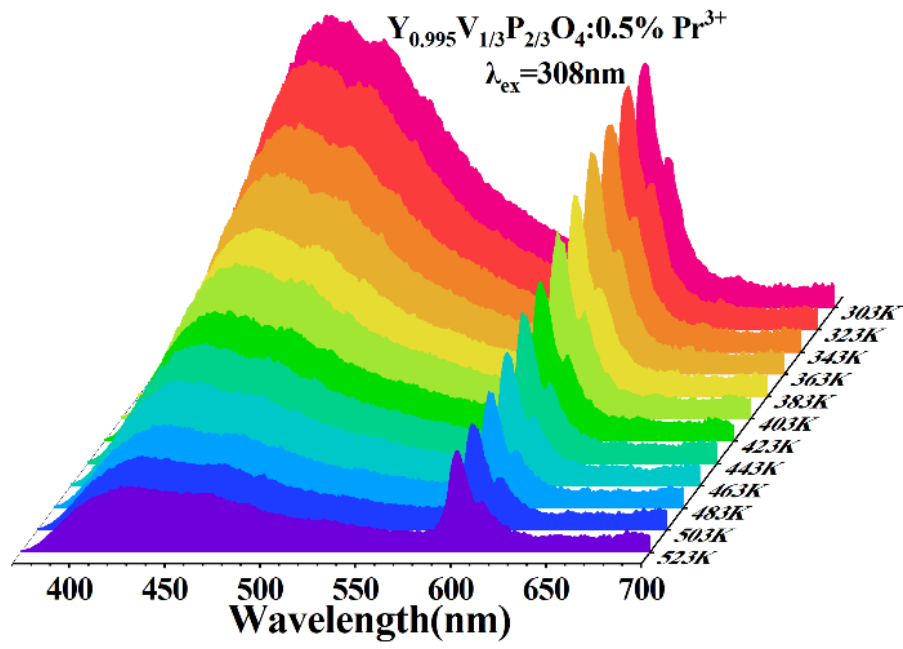

Figure S5. Temperature-dependent PL spectra of  $\text{Y}_{0.995}\text{V}_{1/3}\text{P}_{2/3}\text{O}_4:0.5\%\text{Pr}^{3+}$  under excitation at 308 nm.

Figure S6

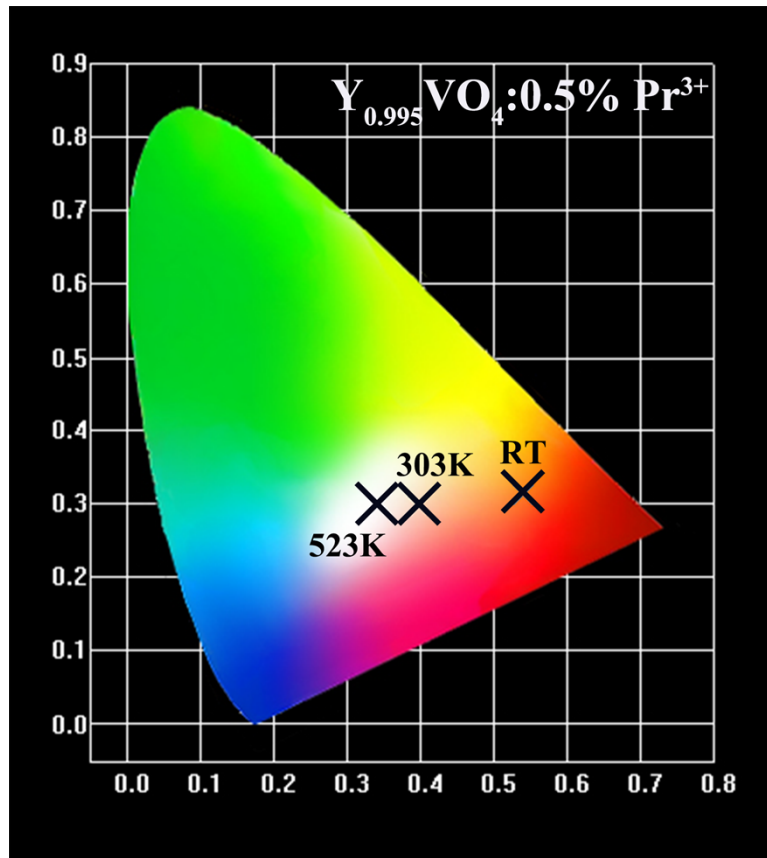

Figure S6. CIE chromaticity diagram of  $Y_{0.995}VO_4:0.5\% Pr^{3+}$  at various temperatures ( $T = RT, 303K, 523K$ ).

Figure S7

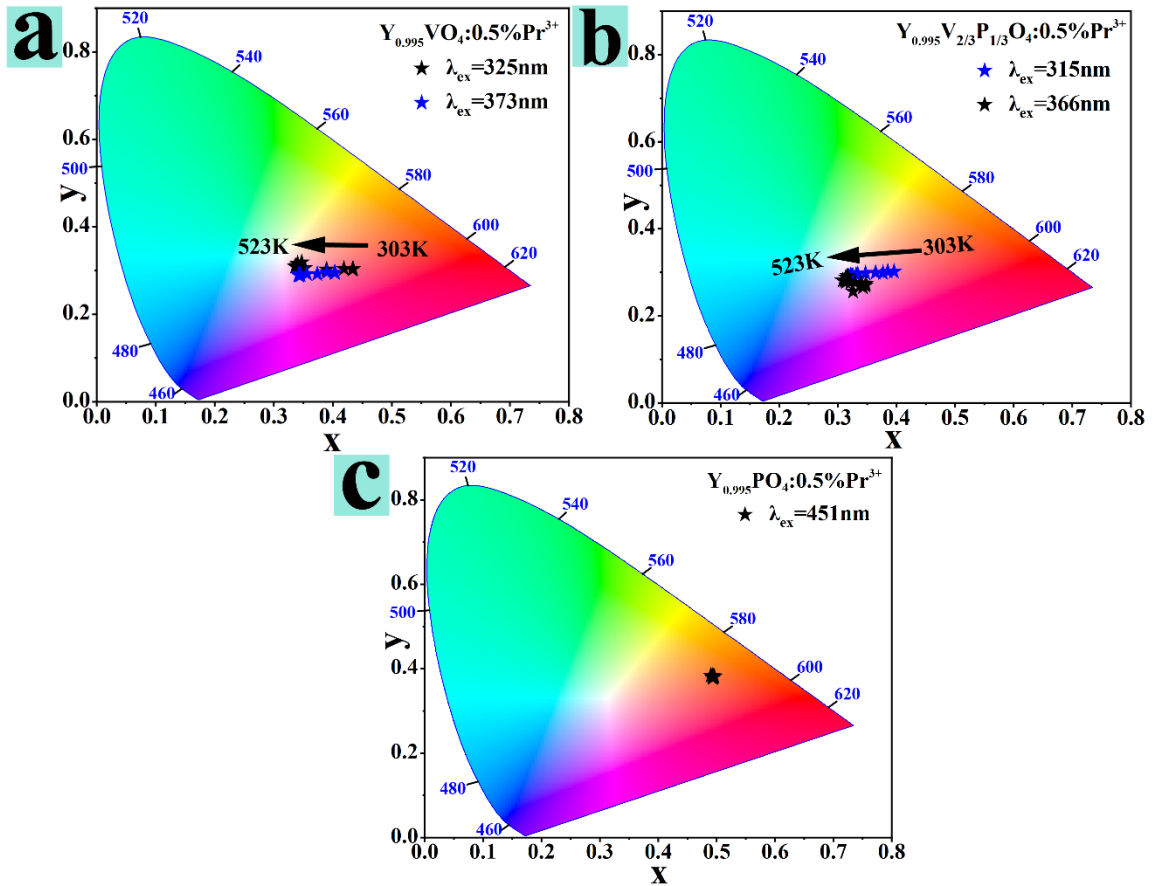

Figure S7. CIE chromaticity diagram of  $Y_{0.995}V_{1-x}P_xO_4:0.5\%Pr^{3+}$  at various temperatures ( $T = 303K-523K$ ). (a)  $x = 0$ . (b)  $x = 1/3$ . (c)  $x = 1$ .



Figure S8

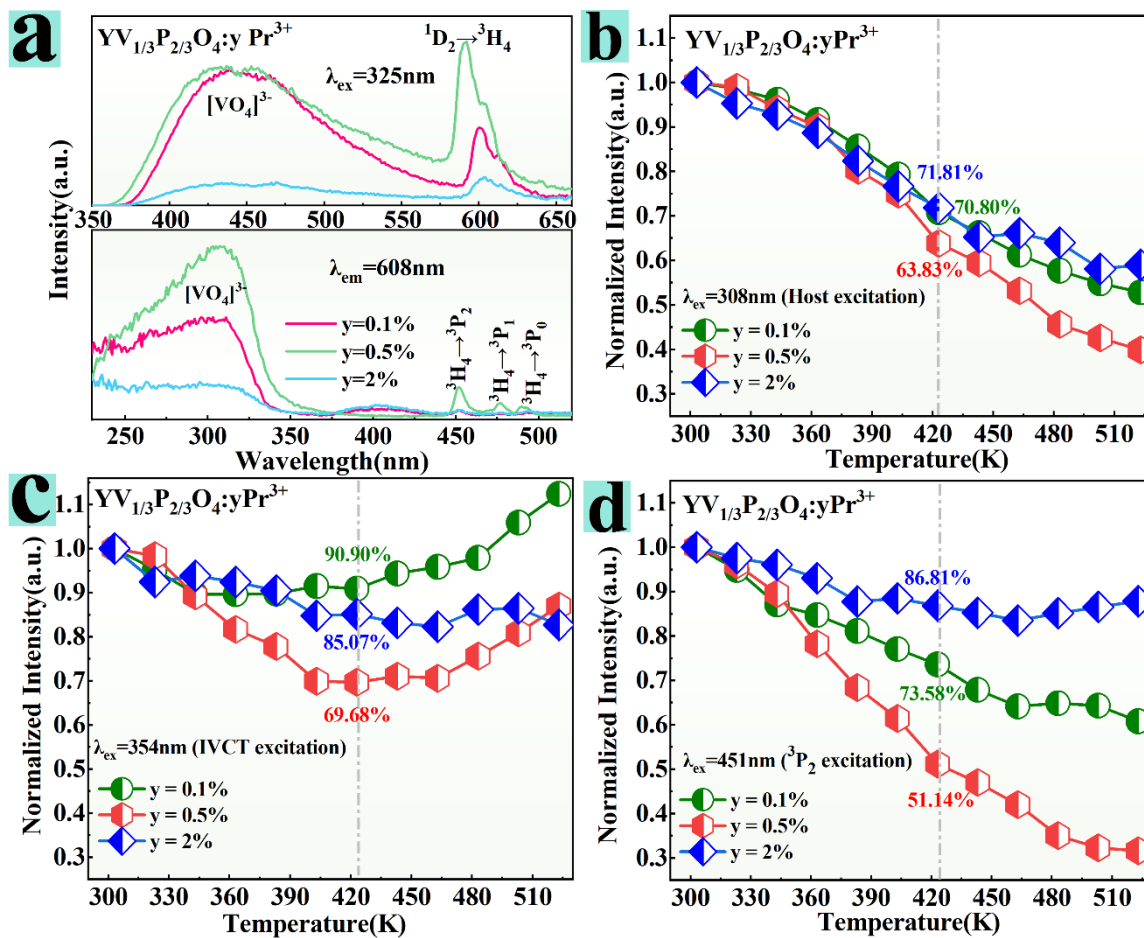

Figure S8. (a) PL and PLE spectra of  $\text{YV}_{1/3}\text{P}_{2/3}\text{O}_4:\text{yPr}^{3+}$  (y = 0.1%, 0.5%, 2%) ( $\lambda_{\text{ex}} = 325\text{ nm}$ ,  $\lambda_{\text{em}} = 608\text{ nm}$ ). Temperature behavior of the integrated intensity of  $^1D_2$  emission of  $\text{YV}_{1/3}\text{P}_{2/3}\text{O}_4:\text{yPr}^{3+}$  (y = 0.1%, 0.5%, 2%) under excitation of (b) the host excitation, (c) the IVCT and (d) the  $^3P_2$  excitation.

Figure S9

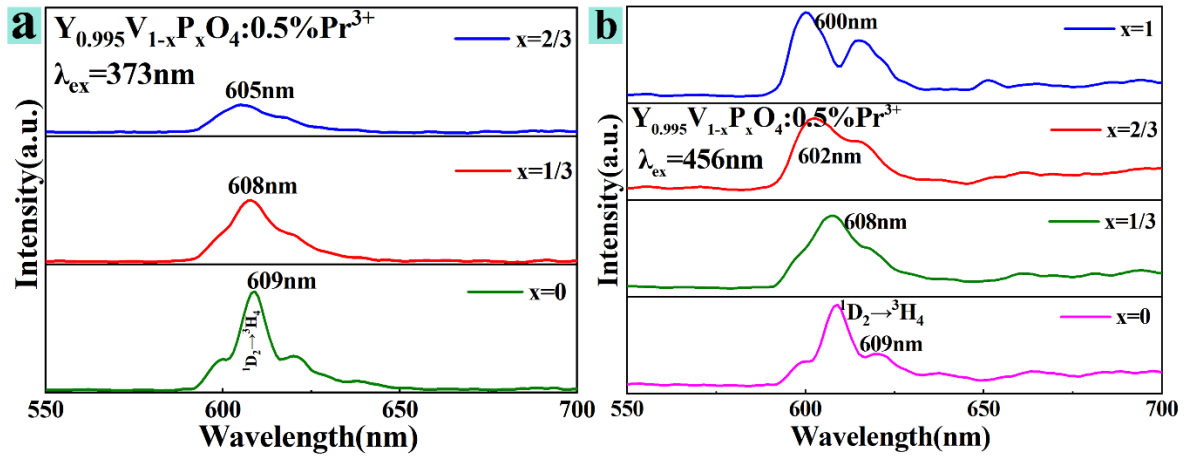

Figure S9. (a) PL spectra of  $Y_{0.995}V_{1-x}P_xO_4:0.5\%Pr^{3+}$  ( $x = 0, 1/3, 2/3$ ) ( $\lambda_{ex} = 373\text{ nm}$ ). (b) PL spectra of  $Y_{0.995}V_{1-x}P_xO_4:0.5\%Pr^{3+}$  ( $x = 0, 1/3, 2/3, 1$ ) ( $\lambda_{ex} = 456\text{ nm}$ ).

**Table S1.** Relevant Rietveld Refinement Parameters and Crystallographic Data.

| Parameter           | X=0     | X=1/3   | X=2/3   | X=1     |
|---------------------|---------|---------|---------|---------|
| Space group         | I41/amd | I41/amd | I41/amd | I41/amd |
| a (Å)               | 7.115   | 7.114   | 6.967   | 6.880   |
| b (Å)               | 7.115   | 7.114   | 6.967   | 6.880   |
| c (Å)               | 6.286   | 6.286   | 6.115   | 6.018   |
| $\alpha$ (deg)      | 90      | 90      | 90      | 90      |
| $\beta$ (deg)       | 90      | 90      | 90      | 90      |
| $\gamma$ (deg)      | 90      | 90      | 90      | 90      |
| V (Å <sup>3</sup> ) | 318.185 | 318.116 | 296.796 | 284.873 |
| units, z            | 4       | 4       | 4       | 4       |
| Rp (%)              | 4.07    | 4.99    | 4.06    | 4.62    |
| Rwp (%)             | 6.92    | 8.32    | 5.67    | 6.62    |
| $\chi^2$            | 3.03    | 3.66    | 2.71    | 3.04    |
